# Supplementary material
Source: PubMed Central journal article supplement (PMC4119551)
Supplement: NIHMS604078-supplement-303407R2_Acknowledgement_Permission.pdf [file NIHMS604078-supplement-303407R2_Acknowledgement_Permission.pdf]

## Circulation Research

---

**From:** Dopico, Alejandro M <adopico@uthsc.edu>  
**Sent:** Thursday, May 22, 2014 12:04 PM  
**To:** circulation.research@circresearch.com  
**Cc:** Jaggar, Jonathan H; Evanson, Kirk W  
**Subject:** CIRCRES/2014/303407R1: LRRC26 is a functional BK channel auxiliary  $\gamma$  subunit in arterial smooth muscle cells

I hereby formally state my permission to be listed in the Acknowledgements of CIRCRES/2014/303407R1: LRRC26 is a functional BK channel auxiliary  $\gamma$  subunit in arterial smooth muscle cells.

Cordially,

Alex M. Dopico, Ph.D., M.D.  
Distinguished Professor & Chair  
Department of Pharmacology  
College of Medicine  
The University of Tennessee Hlth. Sci. Ctr.  
874 Union Ave.  
Memphis, TN 38163  
Tel (901) 448-3822; Fax (901) 448-7206
